# Supplementary material for: Catalytic hydroxylation of [Closo-B12H12]2−—adaptation of the Periana reaction to a polyhedral borane
Source: Royal Society of Chemistry journal article supplement (doi:10.1039/c1cc11722j), 2011-01-01
Supplement: c1cc11722j.pdf [file c1cc11722j.pdf]

## Supplementary Information

### Experimental Section

The  $^{11}\text{B}$  NMR data (160 MHz) were obtained on a Bruker AM-500 spectrometer and referenced to external  $\text{BF}_3 \times \text{Et}_2\text{O}$ . Mass spectra were obtained on Mariner Biospectrometry Workstation by PerSeptive Biosystems. ESI-mass spectra were recorded by operating in negative-ion mode.

**$\text{Cs}_2[\text{closo-B}_{12}(\text{OH})_{12}]$  synthesis:** Cautiously, 10 ml of  $\text{H}_2\text{SO}_4$  (fuming, 20%  $\text{SO}_3$  in  $\text{H}_2\text{SO}_4$ ) was added to a mixture of 0.50 g (1.2 mmol)  $\text{Cs}_2[\text{closo-B}_{12}\text{H}_{12}]$  and 20 mg (0.04 mmol, 4 mol%) of  $[\text{Pt}(\text{bpym})]\text{Cl}_2$ . The suspension was heated at 185 °C for 18 h, leading to a clear solution, which was cooled and then poured on ice. The resulting solution was diluted with 25 ml of water and heated at reflux for 4 days. A colorless precipitate was seen after 1 day of hydrolysis. The precipitated solid was collected by filtration and recrystallized from water to yield 192 mg (42% yield) of  $(\text{H}_3\text{O})_2[\text{closo-B}_{12}(\text{OH})_{12}]$ . This hydronium ion salt was then suspended in water, and aqueous  $\text{Cs}_2\text{CO}_3$  solution was added until the solution was neutral. The resulting solution was concentrated by evaporation until crystals of  $\text{Cs}_2[\text{closo-B}_{12}(\text{OH})_{12}]$  appeared. Finally the solid crystals  $\text{Cs}_2[\text{closo-B}_{12}(\text{OH})_{12}]$  were separated and recrystallized twice from water.

**The scale-up of catalytic hydroxylation - synthesis of  $(\text{H}_3\text{O})_2[\text{closo-B}_{12}(\text{OH})_{12}]$ :** Cautiously, 30 ml of  $\text{H}_2\text{SO}_4$  (fuming, 20%  $\text{SO}_3$  in  $\text{H}_2\text{SO}_4$ ) was added to a mixture of 2.0 g (4.9 mmol) of  $\text{Cs}_2[\text{closo-B}_{12}\text{H}_{12}]$  and 88 mg (0.50 mmol, 10 mol%) of  $[\text{PdCl}_2]$ . The suspension was heated at 195 °C for 72 h, leading to a clear solution. The progress of the reaction was monitored by  $^{11}\text{B}$  NMR. The reaction solution was poured on ice. The solution was diluted with 70 ml of water and heated at reflux for 3 days. The precipitated solid was collected by filtration and recrystallized from water to yield 880 mg (48 % yield) of  $(\text{H}_3\text{O})_2[\text{closo-B}_{12}(\text{OH})_{12}]$ .  $^{11}\text{B}$  NMR ( $\text{H}_2\text{O}$ ): -18.7 ppm.

Mariner Spec /1:33 ASC[BP = 167.0, 73]

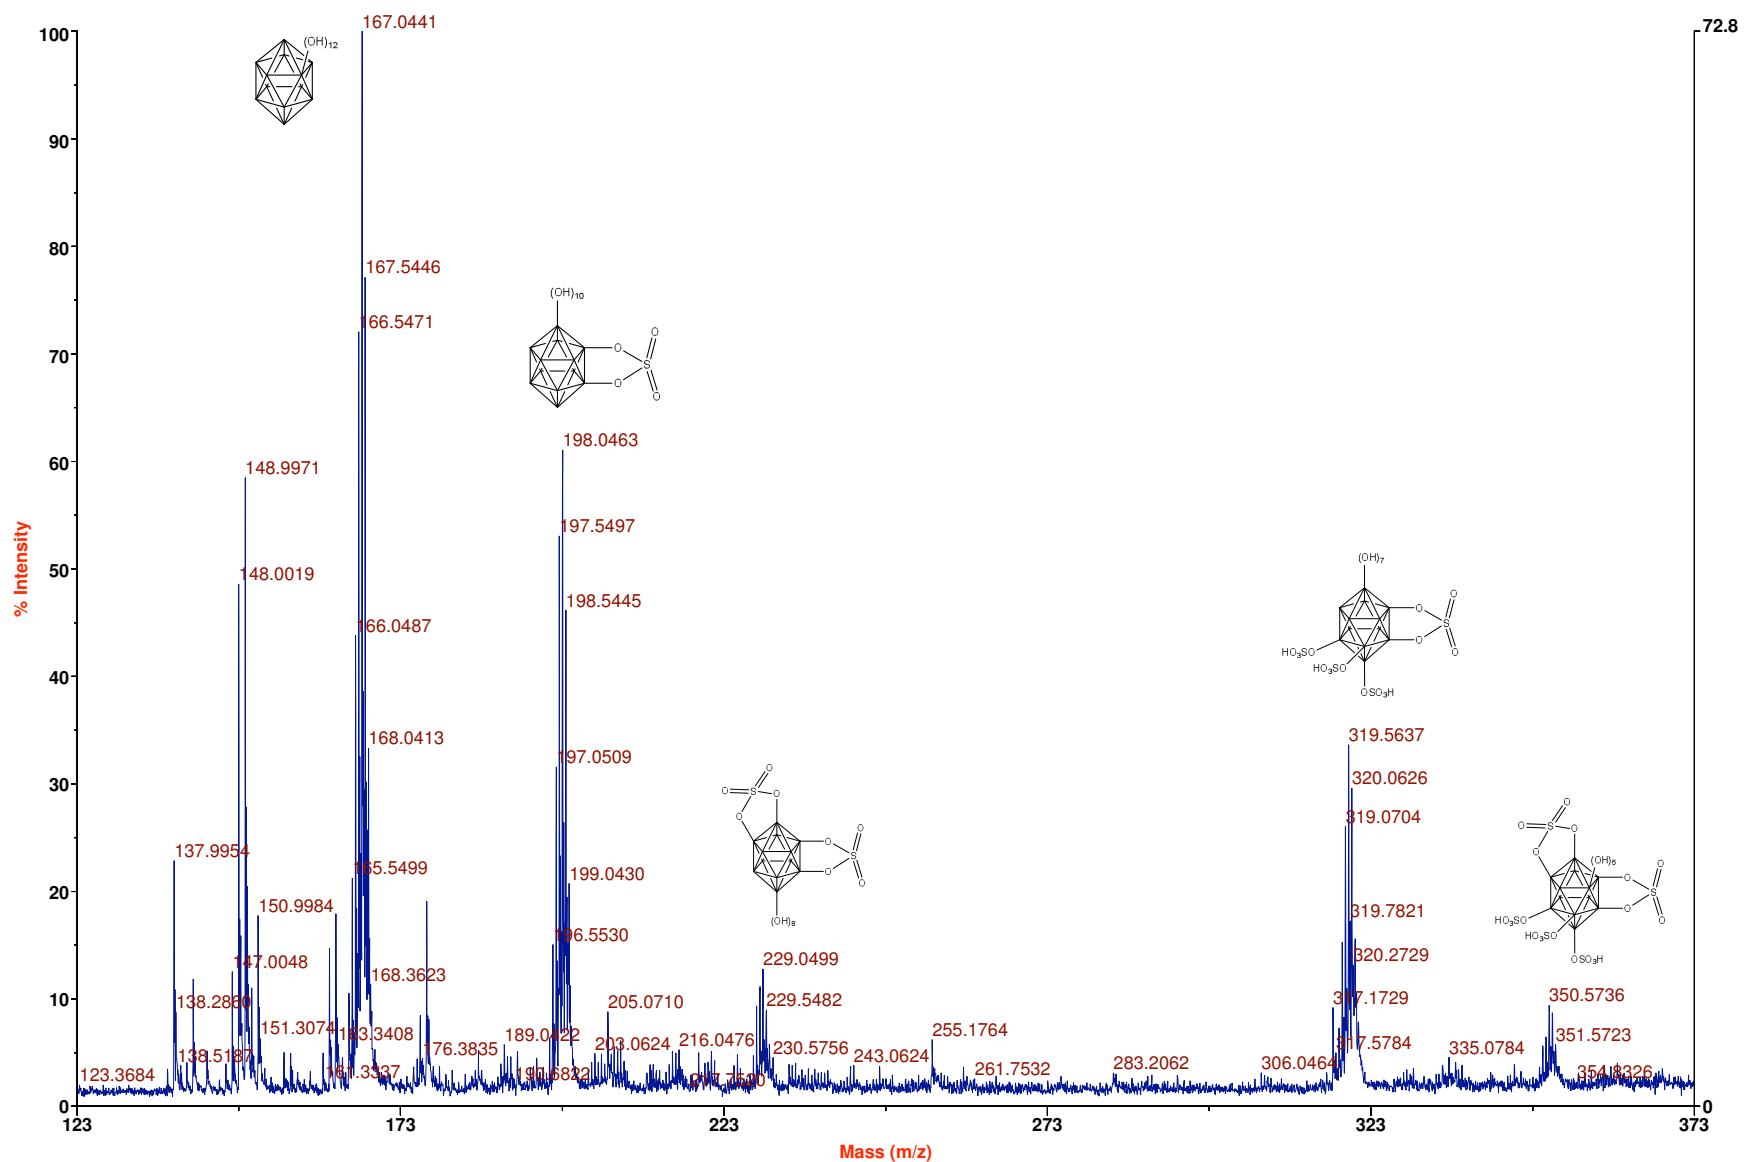

Mariner Mass Spectrum  
C:\...Bond-38001.dat  
Acquired: Jun 16 09:24:00 2010

Figure 1. ESI-MS negative ion mass spectrum of Cs<sub>2</sub>[closo-B<sub>12</sub>(OSO<sub>3</sub>H)<sub>12</sub>] mixture

tba B12OH12 after wash H2O  
B11 None {C:\Bruker\TOPSPIN} oleg 51

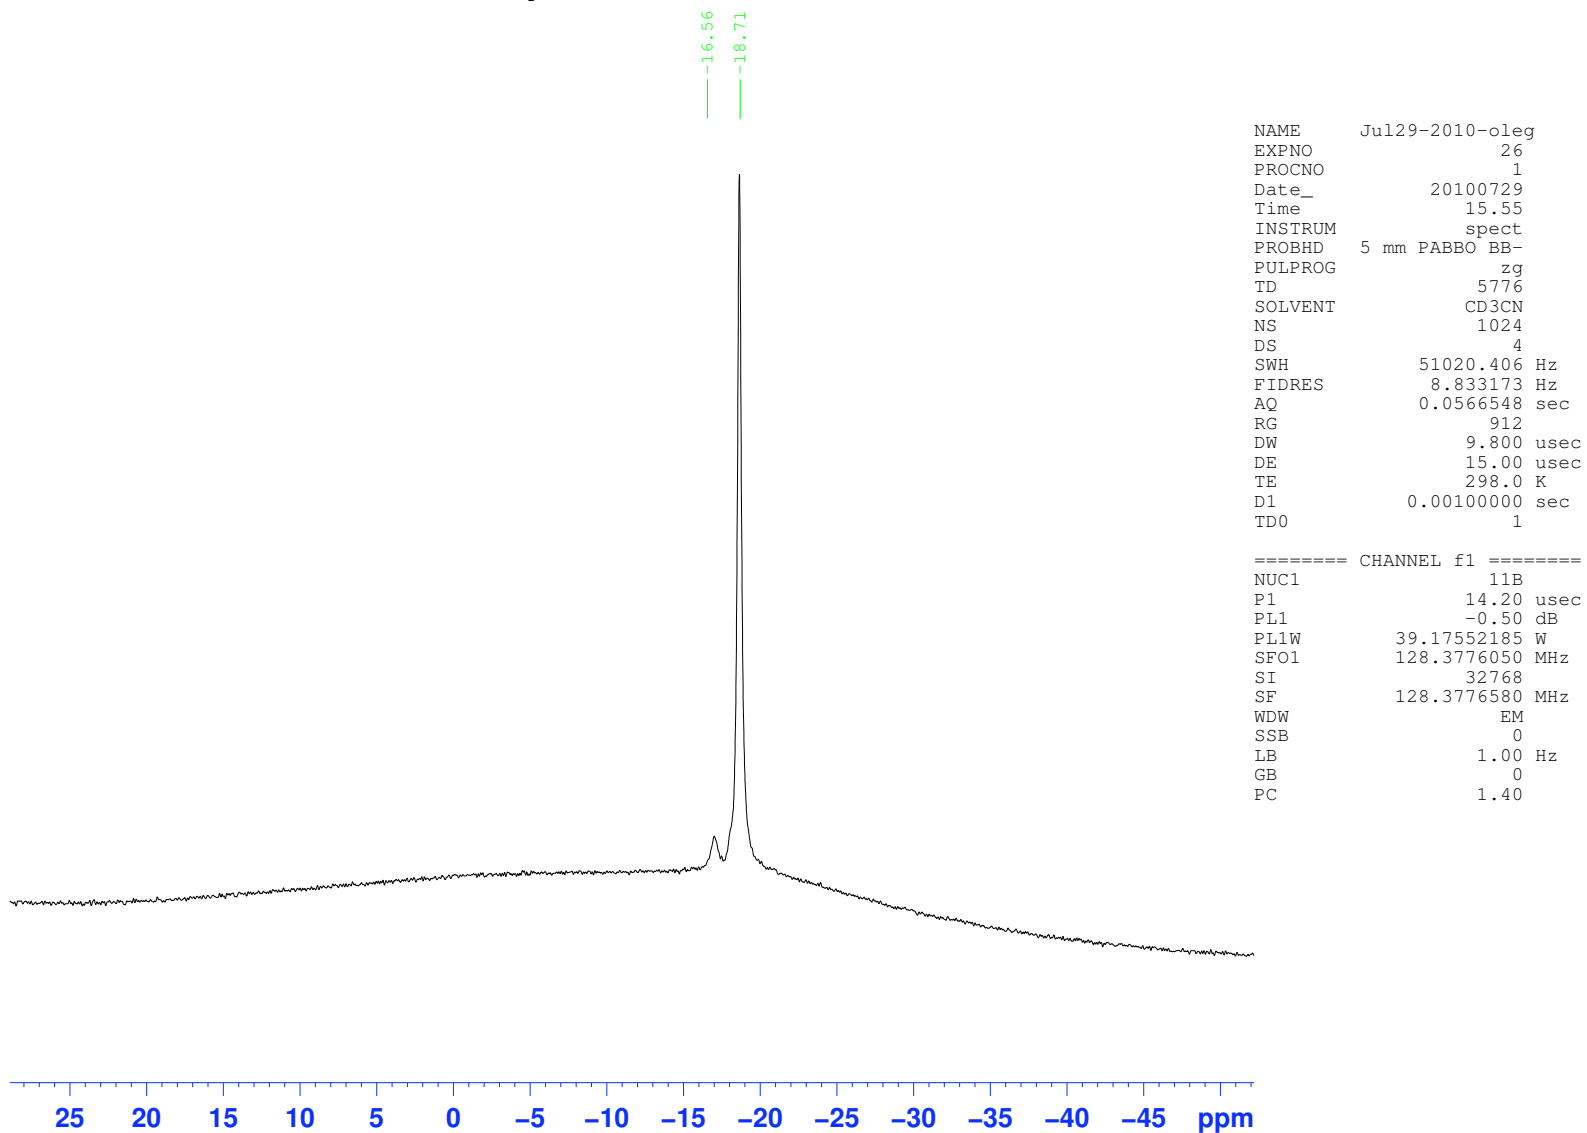

Figure 2a.  $^{11}\text{B}$  NMR of  $(n\text{-Bu}_4\text{N})_2[\text{closo-B}_{12}(\text{OH})_{12}]$  with sulfate ester impurity.

## Applied Biosystems Mariner System 5268

Mariner Spec /1:39 ASC[BP = 167.1, 80]

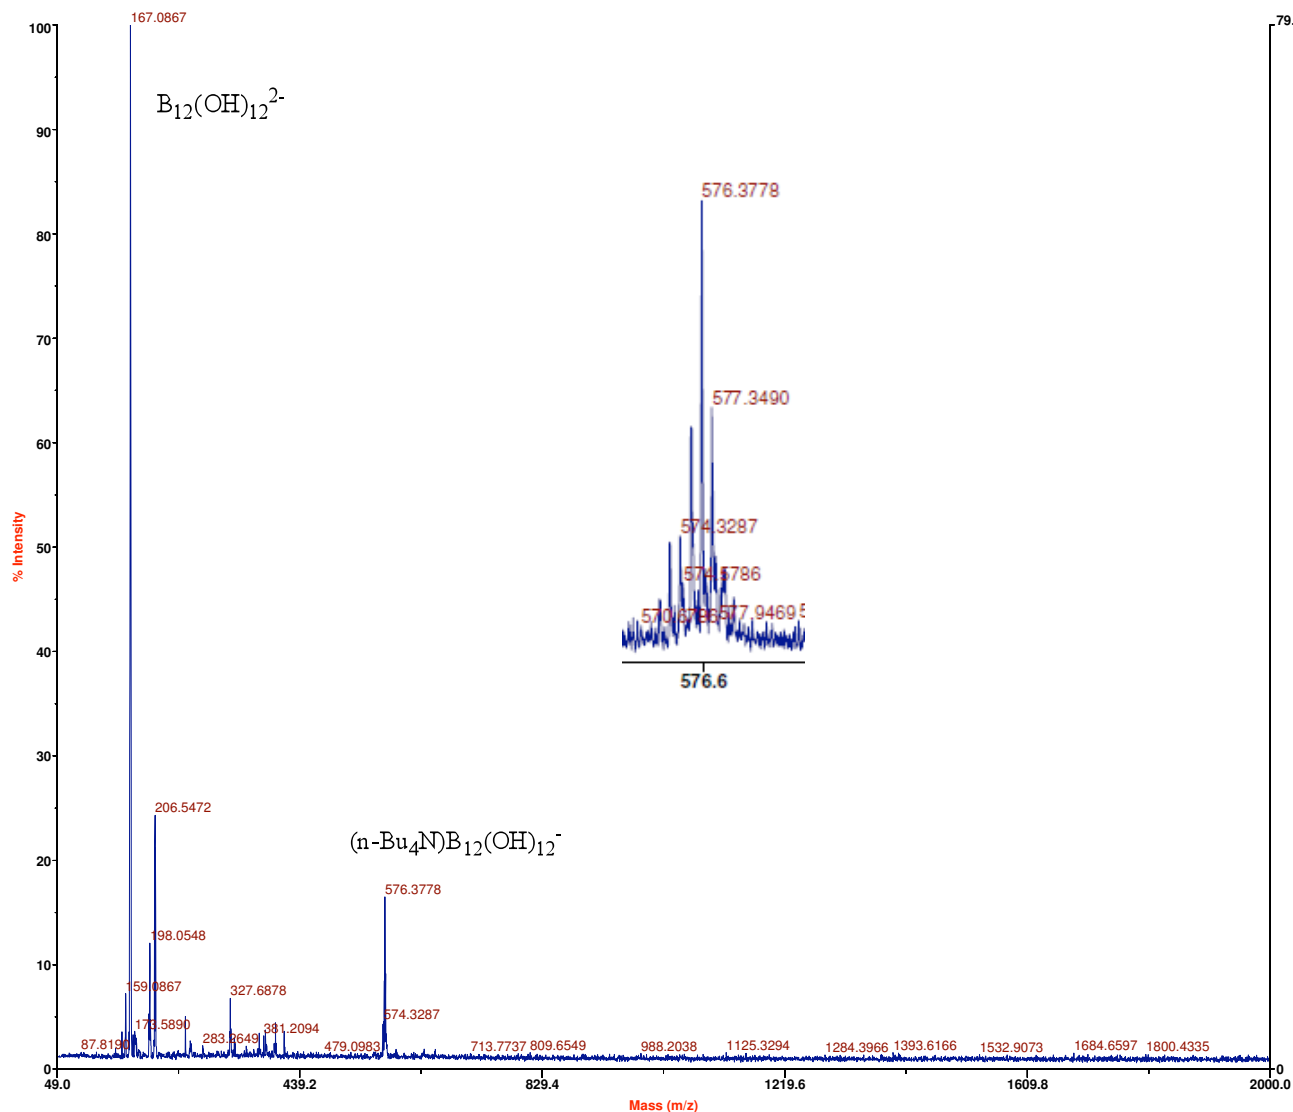

```
--> Mariner System State <--
Instrument State           ON
Ion Polarity              NEG
Auxiliary Gas             ON
Curtain Gas               ON
Nebulizer Gas             ON
Calibration Constant A    5.0073719E-007
Calibration Constant B    72.904961
TDC Deadtime              10
--> Source Settings <--
Spray Tip Potential        4509.96
SCIEX Heater              300.05
--> API Interface Settings <--
Nozzle Potential           80.08
Skimmer 1 Potential        9.20
Quadrupole DC Potential    5.91
Deflection Voltage         -0.20
Einzel Lens Potential       -23.61
Quadrupole RF Voltage      999.76
Quadrupole Temperature     140.01
Nozzle Temperature        190.00
--> Analyzer Settings <--
Push Pulse Potential       490.00
Pull Pulse Potential       213.11
Pull Bias Potential        10.80
Acceleration Potential     3999.94
Reflector Potential        1549.99
Detector Voltage           1850.99
--> Spectrum Acquisition Settings <--
Seconds Per Spectrum       1.00
Ion Count Threshold        0.00
First Mass                 50.00
Last Mass                  2000.00
Accumulate Spectra        OFF
Standby at End of Acquisition OFF
--> Centroid Spectra Settings <--
Centroid Spectra          OFF
--> System Settings <--
Gas Control Mode           Manual
Syringe Pump Mode         Manual
Syringe Pump Rate         50.00
Syringe Diameter          3.26
Min Analyzer Mass         50.00
Max Analyzer Mass         4000.00
```

Acquired: Jul 23 14:15:00 2010  
Mariner Mass Spectrum  
C:\Mariner\Data\2010\July\23 Fri\Bond-87001.dat

Printed: 14:17, July 23, 2010

Figure 2b. ESI-MS negative ion mass spectrum of  $(n-Bu_4N)_2[closo-B_{12}(OH)_{12}]$  with sulfate ester impurity

Mariner Spec /1:39 ASC[BP = 167.1, 80]

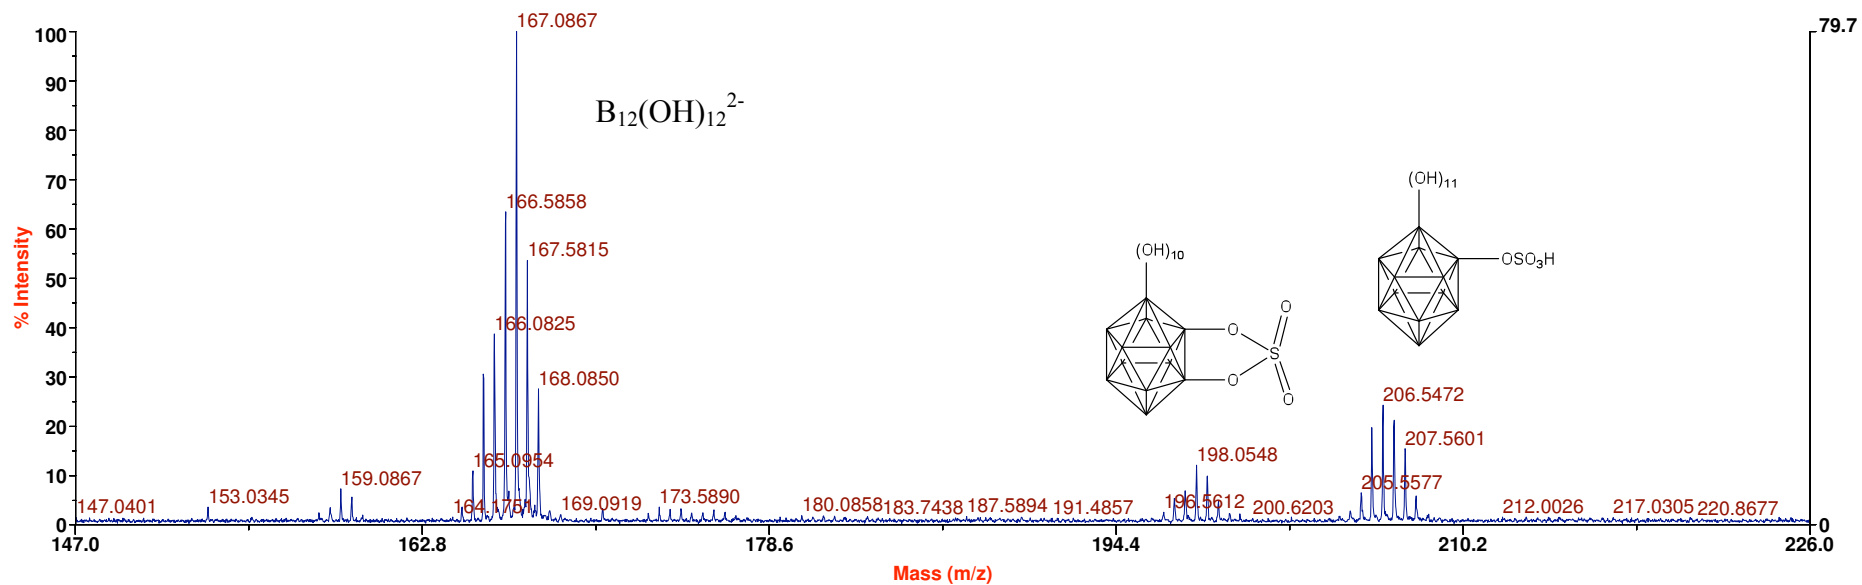

Figure 2c. Expansion of ESI-MS negative ion mass spectrum of (n-Bu<sub>4</sub>N)<sub>2</sub>[*closo*-B<sub>12</sub>(OH)<sub>12</sub>] with sulfate ester impurity.

csB12Oh12 after wash h2O  
B11 None {C:\Bruker\TOPSPIN} oleg 51

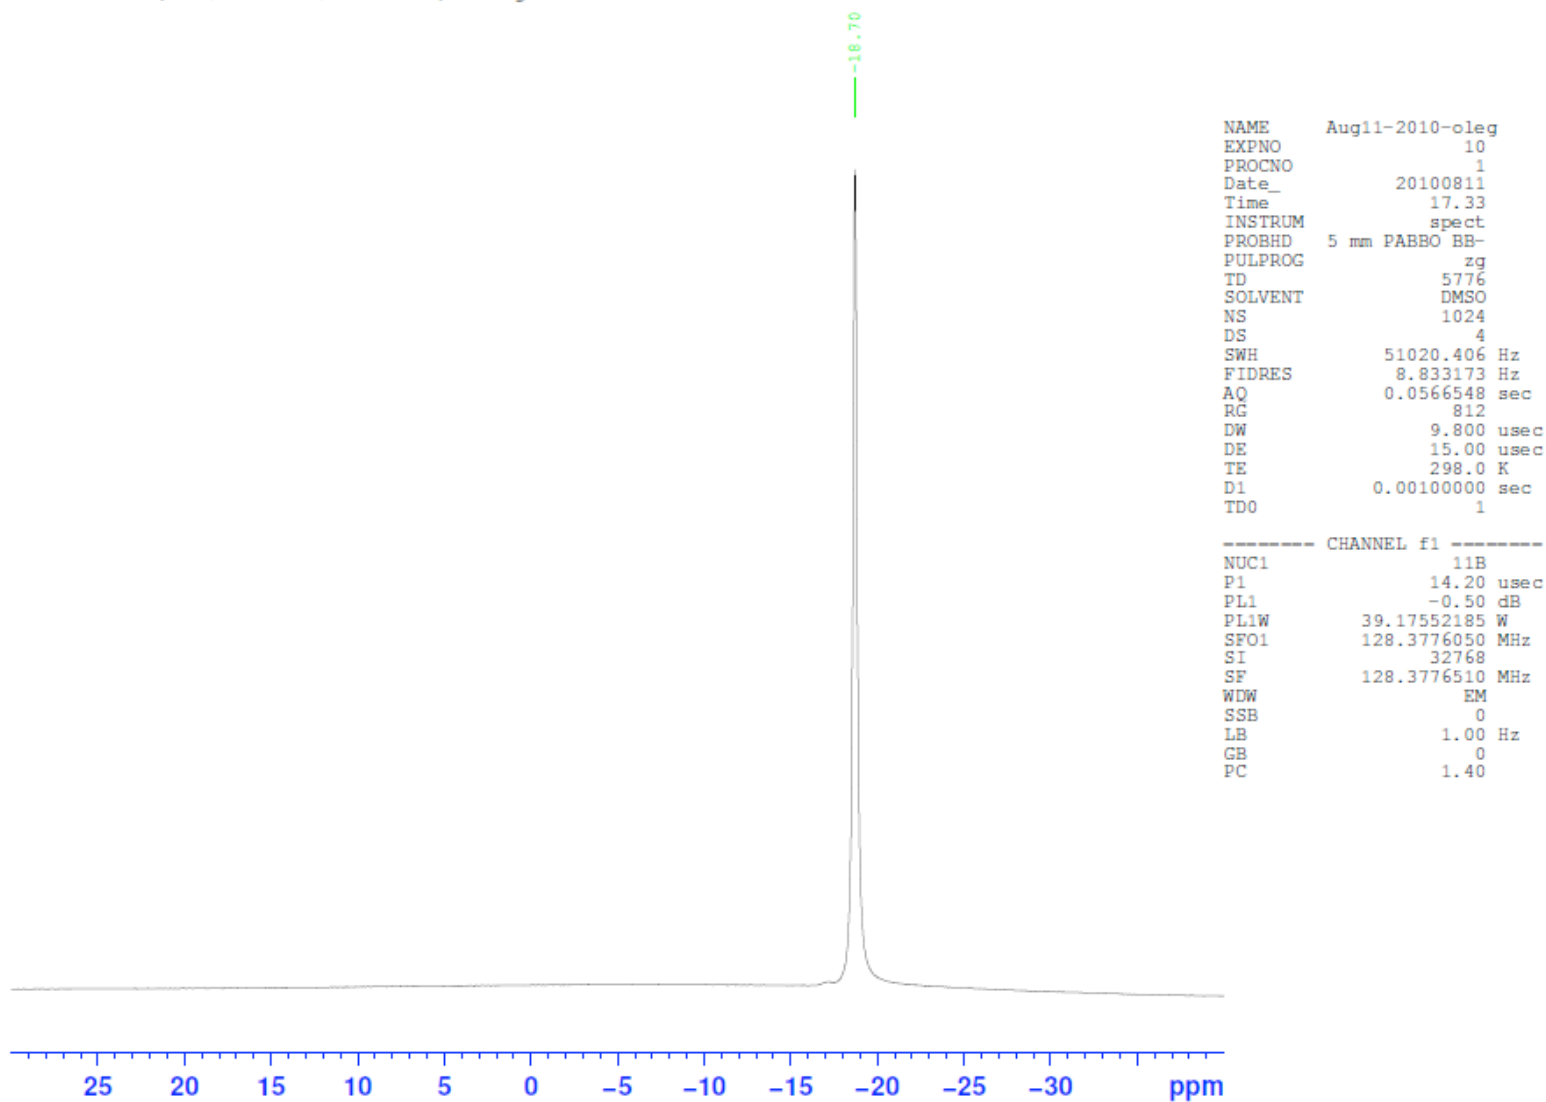

Figure 3a.  $^{11}\text{B}$  NMR of pure  $\text{Cs}_2[\text{closeo-B}_{12}(\text{OH})_{12}]$

Mariner Spec /1:46 ASC[BP = 167.1, 67]

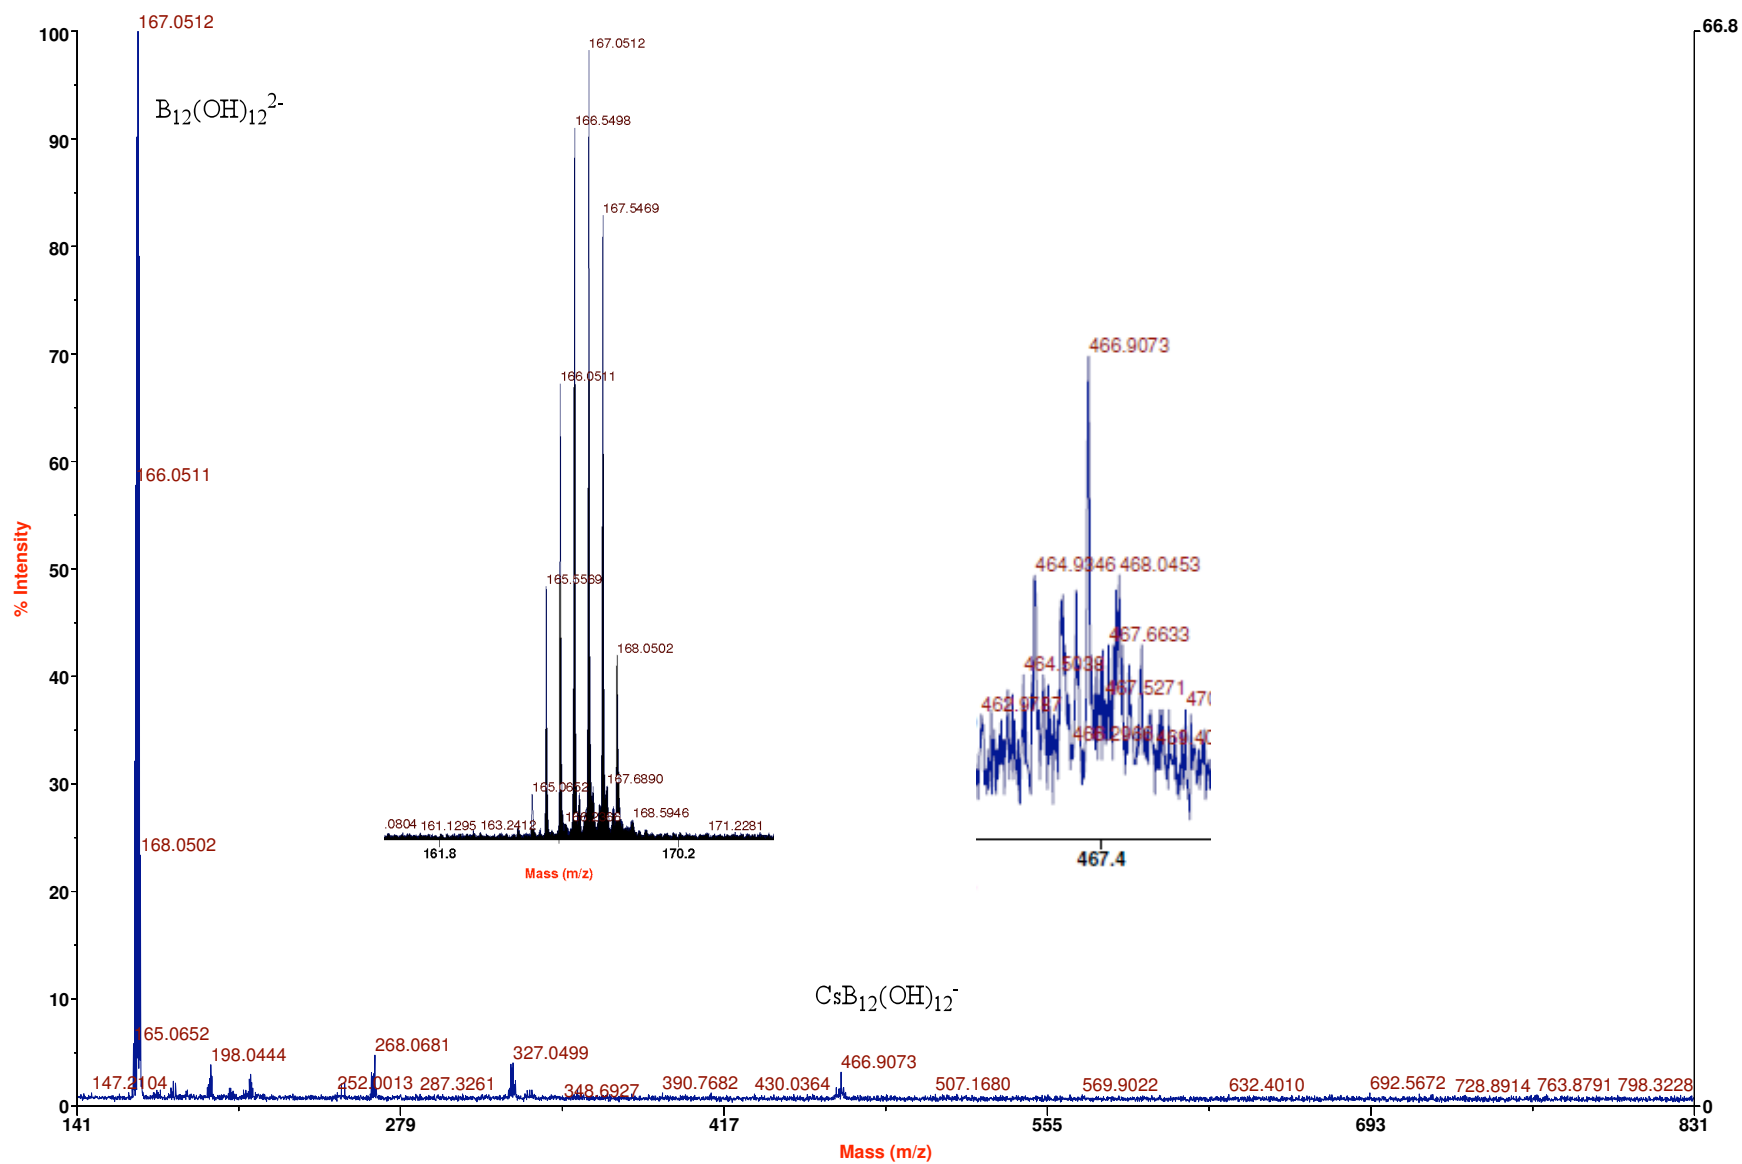

Mariner Mass Spectrum  
 C:\...Bond-107001.dat  
 Acquired: Aug 12 11:25:00 2010

Figure 3b. ESI-MS negative ion mass spectrum of pure  $Cs_2[cliso-B_{12}(OH)_{12}]$
